# Supplementary material for: Perioperative advance care planning for supporting decision-making in elderly patients: a retrospective study and questionnaire survey at a single center
Source: Research Square preprint supplement (doi:10.21203/rs.3.rs-7644227/v1), 2025-11-06
Supplement: Supplementary file 1 [file 167ad042754923728dcd4202.docx]

**Scenario A**

Scenario A was developed by a working group composed of a geriatric psychiatrist, a neurologist, a geriatrician, a palliative care physician, an anesthesiologist, and a legal expert. The final version was reviewed and approved by a geriatric psychiatrist.

Ms. A is an 82-year-old woman living alone in an apartment since her husband passed away 30 years ago. She has two sons, both married, living in Hokkaido and Chiba, respectively.

She had been under regular care at a nearby clinic for hypertension and diabetes mellitus. However, a routine health checkup revealed that she had developed severe anemia. She was referred to a general hospital, where she was hospitalized and received a blood transfusion for serious anemia. Further examinations revealed gastric cancer with multiple liver metastases. A radical cure was deemed impossible.

Three treatment options were presented:

1. Chemotherapy to control cancer progression
2. Gastrectomy as a palliative surgery to reduce anemia and prevent tumor-related bleeding
3. Best Supportive Care (BSC) only

Q1: *If you were in Ms. A’s condition, which of the above three options would you choose?*

Ms. A shared the following with her physician:

"My husband went through painful treatments until the very end, and it was heartbreaking. I don't want to go through that. If I ever get seriously ill, I just want to stay at home and spend my final days quietly—no surgery, no interventions. Please, just let me be."

Q2: *Based on Ms. A’s stated preferences, which treatment option would you choose for her?*

The attending physician held a family meeting with Ms. A’s two sons to explain the diagnosis, prognosis, and Ms. A’s expressed wishes.

The eldest son said:

"My mother was living her normal life at home just yesterday. Please give her all available treatment. If chemotherapy could slow the cancer, I would like her to receive it."

The second son said:

"Honestly, I’m not sure what to do. I won’t be able to be involved in her care going forward, so I will leave the decision to my brother."

Despite the physician's attempt to mediate, no consensus could be reached between Ms. A’s expressed wishes and her eldest son’s demands.

Q3: *In this situation, which treatment option would you choose for Ms. A?*
Q4: *To what extent did Ms. A’s and her eldest son’s wishes influence your decision?*
(0 = Not at all, 1 = Little, 2 = Fairly, 3 = Strongly)

On the 10th day of hospitalization, no treatment plan had yet been decided. During a ward conference, a nurse raised concerns that Ms. A might have dementia. A psychiatric consultation was requested. Ms. A was subsequently diagnosed with mild Alzheimer’s disease, with clear evidence of recent memory impairment and disorientation to time.

The diagnosis was shared with the eldest son, who responded:

"I visited my mother’s home for the first time in four years the other day. It was in complete disarray. She was always so tidy, so it was shocking. I also found a large pile of unadministered medications. I wondered what was going on. Now it all makes sense—my mother has dementia.
So doctor, doesn’t that mean we shouldn’t follow her wishes?"

Q5: *After learning of Ms. A’s dementia diagnosis, which treatment option would you now choose for her?*
Q6: *To what extent did Ms. A’s and her eldest son’s wishes influence your decision?*
(0 = Not at all, 1 = Little, 2 = Fairly, 3 = Strongly)
